*tudor-domain containing protein 5-prime* promotes male sexual identity in the *Drosophila*  
germline and is repressed in females by *Sex lethal*

Shekerah Primus<sup>1</sup>, Caitlin Pozmanter<sup>1</sup>, Kelly Baxter<sup>1</sup>, and Mark Van Doren<sup>1,\*</sup>

<sup>1</sup>Department of Biology, Johns Hopkins University, Baltimore, Maryland, United States  
of America

\*Corresponding author

E-mail: [vandoren@jhu.edu](mailto:vandoren@jhu.edu) (MVD)

Short title: Tdrd5p promotes male germline identity

# Abstract

For sexually reproducing organisms, production of male or female gametes depends on specifying the correct sexual identity in the germline. In *D. melanogaster*, *Sex lethal* (*Sxl*) is the key gene that controls sex determination in both the soma and the germline, but how it does so in the germline is unknown, other than that it is different than in the soma. We conducted an RNA expression profiling experiment to identify direct and indirect germline targets of *Sxl* specifically in the undifferentiated germline. We find that, in these cells, *Sxl* loss does not lead to a global masculinization observed at the whole-genome level. In contrast, *Sxl* appears to affect a discrete set of genes required in the male germline, such as *Phf7*. We also identify *tudor domain containing protein 5-prime* (*tdrd5p*) as a target for *Sxl* regulation that is important for male germline identity. *tdrd5p* is repressed by *Sxl* in female germ cells, but is highly expressed in male germ cells where it promotes proper male fertility and germline differentiation. Additionally, Tdrd5p localizes to cytoplasmic granules with some characteristics of RNA Processing (P-) Bodies, suggesting that it promotes male identity in the germline by regulating post-transcriptional gene expression.

## Author summary

Like humans, all sexually reproducing organisms require gametes to reproduce. Gametes are made by specialized cells called germ cells, which must have the correct sexual identity information to properly make sperm or eggs. In fruit flies, germ cell sexual identity is controlled by the RNA-binding protein *Sxl*, which is expressed only in females. To better understand how *Sxl* promotes female identity, we conducted an RNA expression profiling experiment to identify genes whose expression changes in response to the loss of *Sxl* from germ cells. Here, we identify *tudor domain containing protein 5-prime* (*tdrd5p*), which is expressed 17-fold higher in ovaries lacking *Sxl* compared to control ovaries. Additionally, *tdrd5p* plays an important role in males as male flies that are mutant for this gene cannot make sperm properly and thus are less fertile. Moreover, we find that *tdrd5p* promotes male identity in the germline, as several experiments show that it can shift the germ cell developmental program from female to male. This study tells us that *Sxl* promotes female identity in germ cells by repressing genes, like *tdrd5p*, that promote male identity. Future studies into the function of *tdrd5p* will provide mechanistic insight into how this gene promotes male identity.

# Introduction

Sex determination is an essential process in sexually reproducing species, as the production of eggs and sperm depends on the sexual identity of the germ cells and somatic cells of the gonad. In some animals, such as the medaka fish and the house fly, the sexual identity of the soma determines the sexual identity of the germline. But in other animals, such as fruit flies and mammals, the intrinsic sex chromosome constitution (XX vs. XY) of the germ cells is also important for proper gametogenesis (reviewed in [1]). In such cases, the “sex” of the germ cells must match the “sex” of the soma in order for proper gametogenesis to occur. While studies have revealed a great deal about how sex is determined in the soma, how germline sexual identity is determined by a combination of somatic signals and germline intrinsic properties is much less well understood.

In *Drosophila*, somatic sexual identity is determined by the X chromosome number [2], [reviewed in 3], with two X's activating expression of the key sex determination gene *Sex lethal* (*Sxl*), promoting female identity. The *Sxl* RNA-binding protein initiates an alternative RNA splicing cascade to allow female-specific splicing of *transformer* (*tra*) and, subsequently, *doublesex* (*dsx*) and *fruitless* (*fru*). *dsx* and *fru* encode transcription factors that control somatic sexual identity [reviewed in 4]. *Sxl* is also the key sex determination gene in the germline, as *Sxl* is expressed in the germline in females, and loss of *Sxl* causes female (XX) germ cells to develop as germline ovarian

tumors [5], similar to male (XY) germ cells transplanted into a female soma [6–8]. Further, expression of *Sxl* is sufficient to allow XY germ cells to make eggs when transplanted into a female soma [9]. However, how *Sxl* is activated in the female germline and how it regulates female germline identity remain unknown, except for the fact that both are different than in the soma [6,10–16]. To understand how *Sxl* promotes female germ cell identity, it is essential to discover its targets in the germline.

In this work, we report an RNA expression profiling (RNA-seq) experiment conducted to identify genes regulated downstream of *Sxl* in the germline. We found that a previously uncharacterized tudor domain containing protein, *tudor domain protein 5-prime (tdrd5p)*, is a target of *Sxl* in the germline. *tdrd5p* is strongly expressed in the *Drosophila* early male germline and is repressed by *Sxl* activity in the early female germline. It promotes male identity in the germline, and its loss results in germline maintenance and differentiation defects in males, thus reducing their fertility. Tdrd5p protein localizes to cytoplasmic granules related to RNA Processing (P-) Bodies, suggestive of a function in post-transcriptional regulation of gene expression.

## Results

### Analysis of *Sxl*-dependent gene expression changes in the germline

To investigate how *Sxl* acts to promote female identity in germ cells, we conducted an RNA-seq experiment comparing ovaries with and without *Sxl* function in

the germline. To exclude the major gene expression changes that occur during the later stages of gametogenesis, the RNA-seq experiment was done in the *bag of marbles* (*bam*) mutant background. *bam* is essential for germline differentiation in both males and females; therefore, by using *bam* mutants we focus our experiment on gene expression changes in the early germline, where *Sxl* is expressed most robustly, instead of later stages of gametogenesis (Fig 1A, B). The use of *bam* mutants also gives us the ability to compare similar tissue samples, since ovarian tumors from *bam* mutants and *bam*, *Sxl* double mutants are very similar [17]. Thus, the two genotypes used for the RNA-seq experiment are both in the *bam*-mutant background, with the experimental genotype knocking down *Sxl* in the germline using RNAi (*nanos*-Gal4, UAS-*Sxl*RNAi, *bam*), and a control genotype expressing a control RNAi (*nanos*-Gal4, UAS-*mCherry*RNAi, *bam*). *Sxl* protein in the germline was dramatically reduced in the *Sxl* RNAi samples relative to controls (Fig 1B, C). Additionally, we conducted RNA-seq on *bam* mutant males compared to females, similar to what has been done previously [18] in order to identify male-enriched vs. female-enriched RNAs in the undifferentiated germline. Libraries were prepared from three biological replicates of each genotype and sequenced with 100bp paired-end reads. The raw reads for all libraries were of very high quality—over 95% of the raw reads received a high quality score. In addition, for each library more than 85% of reads were uniquely mapped to the *Drosophila* genome, and all replicates had high replicate correlation.

As *Sxl* can regulate alternative splicing in the soma, we analyzed our RNA-seq data for changes in exon usage using DEXSeq [19]. We filtered these results for statistical significance ( $p_{adj} < 0.05$ ) and for changes in exon expression that were 2-fold or greater (all DEXSeq data is presented in S1 Table). This identified 44 exons from 34 independent genes. A similar number of exons were upregulated in *Sxl*<sup>-</sup> (20, 45%) vs. downregulated (24, 55%). However, manual curation of these data did not reveal strong candidates for relevant biological regulation of alternative splicing by *Sxl*. The main exception was the *Sxl* RNA itself, which in *Sxl* RNAi samples exhibited the characteristic inclusion of the male-specific exon that requires *Sxl* protein in order to be excluded in the female soma. Thus, the residual *Sxl* RNA present after germline *Sxl* RNAi must be insufficient to produce enough *Sxl* protein for *Sxl* autoregulation, further reducing *Sxl* function in the germline and demonstrating the effectiveness of the germline *Sxl* RNAi approach. This analysis also identified the alternative, testis-specific promoter for the male germline sex determination factor *Plant homeodomain containing protein 7* (*Phf7*, [20] as being regulated downstream of *Sxl*, as has previously been described [21]. However, based on this analysis, it does not appear that regulation of alternative splicing is a primary mechanism for *Sxl* regulation of gene expression in the germline.

We also analyzed changes in overall gene expression levels in the presence of absence of *Sxl* function (DE-Seq [22]). 94 genes were differentially expressed between

the two samples (with  $\text{padj} < 0.05$ ), with 40 being upregulated (43%) and 54 being downregulated (57%) in the *Sxl* RNAi samples (S2 Table). 24 of these genes differed 4-fold or more between the two samples (6 upregulated in *Sxl* RNAi, 18 downregulated). We also observed a bias toward X chromosome localization for the differentially expressed genes, with 31.9% being present on the X chromosome compared to only 15.1% of all genes surveyed having X chromosome localization.

We next asked whether *Sxl* acts as a global regulator of X chromosome gene expression/dosage compensation in the germline, as it does in the soma. Despite the X chromosome bias for differentially expressed genes, relatively few X chromosome genes overall (30 genes or 1.2% of X chromosome loci surveyed) were called as differentially expressed in our analysis. Further, if *Sxl* was a global regulator of X chromosome gene expression, we would expect that the overall level of X chromosome gene expression, relative to autosomal gene expression, would be altered in *Sxl* loss of function. However, the overall ratio of average gene expression between the X chromosome and autosomes was little changed between control and *Sxl* RNAi samples (X:A of 1.19 for controls and 1.24 for *Sxl* RNAi). We conclude that *Sxl* is not a global regulator of X chromosome gene expression in the germline.

Lastly, we evaluated the extent to which loss of *Sxl* in the undifferentiated (*bam-*mutant) female germline leads to masculinization of these cells. We conducted principle component analysis on the individual replicates of all four of our experimental

conditions (Fig 1D). We find that *bam Sxl-RNAi* female samples are much more similar to *bam* female samples and control *bam mCherry-RNAi* samples than they are to *bam* male samples. Thus, this analysis does not support a strong masculinization of the *bam*-mutant female germline in the absence of *Sxl*. However, it is also known that *bam* does not affect males and females in exactly the same manner [23] and, in addition, the *bam* male samples also contain male somatic cells while the other samples contain female somatic cells. Both of these factors may contribute to the segregation of the *bam* male sample away from the others. To circumvent this problem, we analyzed the 94 genes differentially expressed between *bam Sxl-RNAi* and control samples to determine whether there was a “male” signature. We determined whether genes differentially expressed in *Sxl-RNAi* compared to controls were also differentially expressed in *bam* males compared to *bam* females. Of the 94 genes differentially expressed in *Sxl RNAi*, a high fraction (44 genes) were also differentially expressed between *bam* male vs. female samples (47%, which is considerably higher than the fraction of total genes in the genome called as different between *bam* male and female, 13%). However, these genes did not always change in the expected direction; only 61% of genes altered in both *Sxl RNAi* and *bam* males changed in the same direction in both, while 39% changed in the opposite direction (Fig 1E). Thus, the *Sxl-RNAi* sample does not appear globally “masculinized” relative to controls and it may be that *Sxl*’s role in repressing male

identity in the early germline is restricted to a few specific targets that are important for the male germline.

One such candidate is a previously uncharacterized gene, *CG15930*, that was strongly upregulated in *Sxl-RNAi* ovaries and is normally enriched in testes. *CG15930* exhibits strong homology to mouse *Tdrd5* [24], which is essential for male germ cell development and spermatogenesis in mice [25]. However, since *CG15930* is not as similar to *Tdrd5* as *Drosophila tejas* [26], and therefore not a paralog of *Tdrd5*, we named this gene *tudor domain containing protein 5- prime (tdrd5p)*. We chose this gene for further study.

# ***tdrd5p* is expressed in a sexually dimorphic manner**

The RNA-seq expression profiles show that *tdrd5p* has a dynamic expression pattern characteristic of genes with sex-specific functions. *tdrd5p* is 18-fold enriched in *bam* testes compared to *bam* ovaries, and is upregulated 17-fold in *bam*, *Sxl-RNAi* ovaries relative to *bam*, control-RNAi ovaries (Fig 2A), and is clearly enriched in *bam*, *Sxl-RNAi* ovaries by RT-PCR (Fig 2B). This is in contrast to *nanos*, which is expressed at similar levels in all of the genotypes in our RNA-seq experiment (Fig 2A), consistent with its role in the germline of both sexes. Changes in *tdrd5p* expression were restricted to total RNA levels, and no change in exon usage was detected. *In situ* hybridization to wild-type gonads revealed that *tdrd5p* expression is highly enriched in the testis,

particularly at the apical tip of the testis where the germline stem cells and proliferating gonial cells reside (Fig 2C-D). The finding that *tdrd5p* is expressed at high levels in testes relative to ovaries, and is repressed by *Sxl* in the ovary, suggests that it plays a role in male germline development or function.

To determine the expression pattern of Tdrd5p protein, we generated a genomic transgene that includes a hemagglutinin (HA) epitope tag at the N-terminus of the Tdrd5p protein. The tag was inserted immediately following the start codon of the gene within a 20kb BAC that extends well upstream and downstream of the genes neighboring *tdrd5p* (S1 Fig), and is therefore likely to recapitulate endogenous expression. Anti-HA immunostaining shows that Tdrd5p protein is expressed in the germline of the testis, and is also present in the ovary at lower levels (Fig 2E, F). HA:Tdrd5p is observed in male germline stem cells, spermatogonia and spermatocytes. The protein is seen in distinct foci that are smaller and more numerous in germline stem cells (Fig 2G, arrows), but appear larger in spermatocytes (Fig 2E arrows). The foci are predominantly cytoplasmic, with many abutting a perinuclear germline structure called the nuage. The accumulation of Tdrd5p into cytoplasmic punctae is characteristic of ribonucleoprotein complexes ("RNA bodies") [reviewed in 27], and suggests that it may be involved in mRNA decay or translational repression. Interestingly, HA:Tdrd5p co-localizes with *decapping protein 1*, (YFP-DCP1, Fig 2H, arrows), which plays a major role in mRNA degradation, and is also required for *osk* mRNA localization to the posterior

of the oocyte [28], [reviewed in 29]. As DCP-1 is localized to “Processing bodies” (P-bodies), Tdrd5p appears to be present in a subset of these structures.

HA:Tdrd5p protein expression is upregulated in ovaries that are mutant for *Sxl* function in the germline (Fig 3A-B). Note that the punctae seen in males are also present in *Sxl* RNAi ovaries, though they are fewer in number (Fig 3D, arrows). Thus, the derepression of *tdrd5p* in *Sxl* RNAi ovaries is also detected at the protein level.

Interestingly, the *tdrd5p* mRNA has 2 putative *Sxl* binding sites [30,31], one within the 3rd intron and the other in the 3' UTR (S1 Fig). This suggests that *Sxl* may directly regulate *tdrd5p* expression by binding to one or both of these sites and influencing *tdrd5p* RNA processing in the nucleus or translation in the cytoplasm. To assess *Sxl*'s direct regulation of *tdrd5p*, we mutated both *Sxl* binding sites in the a HA:*tdrd5p* transgene (HA:*tdrd5p*<sup>ddel</sup>). We found HA:*tdrd5p*<sup>ddel</sup> flies show upregulation of HA:Tdrd5p in the female germline (Fig 3C, E), similar to the upregulation caused by loss of *Sxl* from the germline. Quantification of this difference by western blot showed that HA:Tdrd5p is 3-fold upregulated in the female germline of HA:*tdrd5p*<sup>ddel</sup> flies .

However, quantitative RT-PCR analysis specific for the HA-tagged transgenes showed no significant difference in RNA expression between ovaries of HA:*tdrd5p* flies compared to HA:*tdrd5p*<sup>ddel</sup> flies (data not shown). This suggests that *Sxl* directly regulates the expression of Tdrd5p protein in the female germline by repressing

translation. The basis for the changes we observed in *tdrd5p* RNA levels in *Sxl* RNAi ovaries by RNA-seq remains unknown.

### ***tdrd5p* is required for proper male fertility & germline differentiation**

The male-biased expression pattern of *tdrd5p* suggests it may have an important function in the male germline. Knocking down *tdrd5p* function in the germline by RNAi, however, produced no observable phenotype. To conduct a more comprehensive study of *tdrd5p* function we generated *tdrd5p* mutant alleles using CRISPR-Cas9 genome editing. We generated several independent predicted null alleles of *tdrd5p* (S1 Fig), and analyzed male fertility and testis morphology of both young males and aged males. We determined that young (5 days old) *tdrd5p* mutant males have a 50% reduction in fecundity compared to controls (Fig 4F), suggesting that *tdrd5p* is required for proper male fertility.

To characterize the germ cell defects that may lead to decreased fecundity, we evaluated several aspects of germ cell differentiation in young and aged mutant males. While testes of newly eclosed males appeared similar to wild-type, testes of older males (15-20 days old) exhibited a dystrophic “skinny testis” phenotype with a dramatic reduction in the germline (Fig 4A-C). This was observed in 7% of animals raised at 25°C and 18% of animals raised at 29°C. Additionally, 15% of males exhibited a displaced hub phenotype (Fig 4E arrow), where the hub is no longer located at the apical tip of the

testis as seen in wild-type (Fig 4D arrow). These combined phenotypes suggest a defect in proper germline differentiation and maintenance. Analyzing the expression of critical germ cell differentiation genes such as *bam* and *spermatocyte arrest* (required for meiotic cell cycle progression) [32] did not shed further light on the germ cell defect. Therefore, while the morphological defects present at a low penetrance, their overall effects culminate into a substantial reduction in fecundity; a phenotype which supports *tdrd5p* importance in male germline development.

Tudor domain-containing proteins have well known functions in small RNA pathways, transcriptional regulation, and the assembly of snRNPs [reviewed in 33]. The closest *Drosophila* homolog to *tdrd5p* is *tejas*, and the closest mammalian homolog to *tdrd5p* is mouse TDRD5. Both *tejas* and TDRD5 have been shown to function in the piRNA pathway and to repress the expression of transposons in the germline [25,26,34]. Interestingly, we found no changes in transposon expression in *tdrd5p* mutants in our RNA-seq analysis (data not shown). We also analyzed the expression of a wide variety of transposons by quantitative rtPCR and found little to no difference between wt and *tdrd5p*-mutant testes (data not shown). Defects in the piRNA pathway can also lead to increased accumulation of the Stellate protein in the male germline [35,36]. We examined the expression of Stellate in *tdrd5p* mutant males, as well as in *tdrd5p* mutant males also heterozygous for mutant alleles of *tejas*, *ago3* or *aubergine* (two PIWI proteins with key functions in the piRNA pathway). None of these testes showed the increased

Stellate expression observed in *tejas* homozygous mutant testes (S2 Fig, [26]). Therefore, while *tdrd5p*'s activity is important for the proper development of the male germline, it has a distinct function from regulation of transposon expression.

### ***tdrd5p* promotes male identity in the germline**

The sex-specific nature of *tdrd5p*'s expression and mutant phenotype suggests it may play a role in promoting male germline sexual identity. However, unlike the male-specific *Phf7* gene [20], expression of UAS-*tdrd5p* in the female germline did not, by itself, result in defects in the female germline (data not shown). To further investigate *tdrd5p*'s role in sexual identity, we decided to conduct our experiments using the sensitized genetic backgrounds frequently used for the investigation of genes involved in sexual identity. Females mutant for *transformer* (*tra*)—a key player in the somatic sex determination pathway—undergo a transformation so that the somatic gonad of XX *tra* mutants develops as male instead of female. However, because the germline is XX, and therefore incompatible with spermatogenesis, the germline of these testes is highly undeveloped, causing these animals to be sterile (Fig 5B). A strong test of a gene's ability to promote male identity in the germline is to determine whether it is sufficient to induce XX germ cells to enter spermatogenesis in these animals. Indeed, expression of *tdrd5p* in the germline of XX *tra* mutants resulted in a robust rescue of spermatogenesis. 18% of these animals had highly developed testes that were wild type

in size, containing all of the stages of germ cell differentiation up to spermatocytes (Fig 5C, note: since these animals lack a Y chromosome and the spermatogenesis genes located there, they were not expected to be fertile). This is strong evidence signifying that *tdrd5p* promotes male identity in the germline.

Similarly, if *tdrd5p* promotes male identity in the germline, we would expect that it would be able to enhance the ability of other mutations to masculinize the female germline. Homozygous mutants of *ovarian tumor (otu)* and *sans fille (snf)* have been shown to masculinize the female germline and cause germline tumors in ovaries, similar to *Sxl*-RNAi [37–40], while females heterozygous for mutant alleles of *otu* and *snf* are fully fertile and have normal ovary morphology. However, ectopic expression of *tdrd5p* in the germline of females heterozygous for *otu* or *snf* resulted in the formation of ovarian tumors. 25% of *snf/+; nos > tdrd5p* ovaries have large, pervasive germline tumors similar to the homozygous *snf* mutants (Fig 5D-F). Another 25% of these ovaries show a complete loss of the germline (Fig 5G), which phenocopies strong sex determination mutants [37,41]. Additionally, 40% of *otu/+; nos > tdrd5p* ovaries exhibit either ovarian tumors or complete loss of germline. This evidence supports *tdrd5p* as a male-promoting factor in the germline. We therefore conclude that *tdrd5p* functions in germline sexual identity; it promotes male identity in the germline and is repressed by *Sxl* in the female germline.

# Discussion

## The role of *Sxl* in the germline

It has been known for many years that *Sxl* is necessary for female germline identity [7,8], and *Sxl* has also been shown to be sufficient to allow XY germ cells to undergo oogenesis [9]. It is likely that *Sxl* plays multiple roles in the germline, both to promote female identity in the early germline, perhaps as early as in the embryonic germline [9], and in regulating the differentiation of the germline during oogenesis [42]. Here we examined the role of *Sxl* more specifically in the undifferentiated germline through the use of *bam* mutants. Principle component analysis indicated that, under these conditions, samples with *Sxl* function reduced in the germline clustered close to control female samples, and far from male samples. While some of the male/female differences may be contributed by the somatic cells present in these samples, we conclude that reducing *Sxl* function in the undifferentiated germline does not lead to a dramatic masculinization at the whole-genome level. In contrast, we propose that the role for *Sxl* in the early germline may be restricted to a relatively small number of changes in sex-specific germline gene expression that are important for female vs. male germline function.

Recently, a genomic analysis of ovaries mutant for the RNA splicing factor *sans fille* (*snf*) was conducted [21]. This is considered to also be a *Sxl* germline loss-of-function condition as one important change in *snf*-mutant ovaries is a loss of *Sxl*

expression and an ovarian tumor phenotype that can be rescued by *Sxl* expression [17,42,43]. In contrast to our results, an increased expression of spermatogenesis genes was observed in *snf* tumorous ovaries compared to wild type ovaries. It is likely that changes in these “differentiation” genes were not observed in our *bam*-mutant samples since germline differentiation is arrested at an earlier stage in *bam* mutants, allowing us to focus on the undifferentiated germline. Thus, these two analyses can help separate the role of *Sxl* in regulating early germline sexual identity vs. later aspects of sex-specific germline differentiation. Interestingly, one “differentiation” gene was identified in both RNA-seq analyses: the testis-specific basal transcription factor *TATA Protein Associated Factor 12L* (*Taf12L* or *rye*). This may indicate that *Taf12L* could play a role in the undifferentiated germline as well as the later stages of spermatocyte differentiation. In addition, both analyses found evidence for differential regulation of the important male germline identity factor *Phf7* [20], where an upstream promoter is utilized preferentially in the male germline and is repressed downstream of *Sxl* in females [21 and data not shown]. This indicates a role for *Phf7* in both the early and differentiating germline. Finally, we did not observe strong candidates for targets of alternative RNA splicing regulated by *Sxl*. The only strong candidate for alternative RNA splicing was the *Sxl* RNA itself, where the male-specific exon was retained in the residual *Sxl* RNA from the *Sxl RNAi* samples. This provides further evidence that *Sxl* autoregulation occurs in the germline as it does in the soma, as has previously been proposed [44]. It is

likely that *Sxl* may also act at the level of translational control in the germline, as our evidence indicates here for regulation of *Tdrd5p*. Future experiments to identify *Sxl*-associated germline RNAs will be important for investigating this mechanism of action, as has recently been conducted [9].

In addition to its role in sex determination in the soma, *Sxl* also acts to initiate global X chromosome gene regulation and dosage compensation through translational control of *male-specific lethal-2* [45], and it is possible that *Sxl* plays a similar role in the germline. Whether or not the germline even undergoes dosage compensation is controversial, and thoughtful work has led to opposite conclusions [46,47]. Further, if dosage compensation does exist in the germline, it must utilize a separate mechanism from the soma, as the somatic dosage compensation complex members *msl1* and *msl2* are not required in the germline [48,49]. However, *Sxl* could retain an *msl*-independent role to regulate global X chromosome gene expression in the germline. We did not observe evidence for this. First, few X chromosome genes were differentially expressed between *Sxl*- and control samples (30 genes or 1.2% of X chromosome genes tested). Second, the ratio of average gene expression between X chromosome genes and autosomes was very similar in *Sxl*- females compared to control females (X/A for controls: 1.24, *Sxl*:- 1.19) and this was similar when considering only genes in particular expression categories (e.g. all genes with some expression in both samples). Thus, it appears likely that *Sxl*'s role in the germline is distinct from that in the soma; it acts to

control sex-specific gene regulation and sexual identity in both the germline and the soma, but acts as a general regulator of X chromosome gene expression and dosage compensation only in the soma.

# ***tdrd5p* promotes male germline identity.**

We show here that *tdrd5p* is both a target for *Sxl* regulation and is important for male germline identity and spermatogenesis. *tdrd5p* expression is highly male-biased, both at the RNA and protein levels (Fig 2). When female germ cells are sensitized by partial loss of female sex determination genes, expression of *tdrd5p* exacerbates the masculinized phenotype in these germ cells (Fig 5). Significantly, expression of *tdrd5p* is sufficient to promote spermatogenesis in XX germ cells present in a male soma (XX *tra*-mutant testes, Fig 5). Thus, *tdrd5p* clearly has a role in promoting male germline identity.

Loss of *tdrd5p* also has a strong effect on male fecundity, even though it is not absolutely required for spermatogenesis. The 50% reduction in fecundity is a strong effect and indicates that *tdrd5p* plays an important role in the male germline. However, the fact that some spermatogenesis still proceeds suggests that other factors act in combination with *tdrd5p* to control this process. One good candidate is *Phf7* which we have previously demonstrated to have a similarly important, but not absolute, requirement for spermatogenesis [20]. However, our analyses of *tdrd5p*, *Phf7* double

mutants did not reveal any synergistic effect on male germline development or fecundity (data not shown). This suggests that other important players in promoting male germline identity remain to be identified.

Our data indicate that Tdrd5p regulates male germline identity by influencing post-transcriptional gene regulation. Other tudor-domain containing proteins have been shown to act in RNA-protein bodies to influence RNA stability and translational regulation [reviewed in 33]. Further, Tdrd5p localizes to cytoplasmic punctae, specifically a subset of the punctae that also contain Decapping Protein1 (DCP-1), suggesting that these bodies are related to Processing bodies (P-bodies) that are known to control post-transcriptional gene regulation [28,50], [reviewed in 29]. Interestingly, Tdrd5p's closest homologs, Tejas in flies and TDRD5 in mice, have been shown to regulate piRNA production and transposon regulation [25,26]. Further, their localization to VASA-containing nuage is thought to influence transposon control [26,51]. However, we observe no changes in transposon expression regulated by *tdrd5p*, and Tdrd5p does not co-localize with VASA in nuage. We have also not observed any genetic interaction between *tejas* and *tdrd5p* (data not shown). Thus, we propose that Tdrd5p plays a distinct role in regulating male germline identity and spermatogenesis, and this may be in the regulation of mRNAs rather than transposons. One possibility is that the role of mouse TDRD5 in transposon regulation and spermatogenesis has been separated into the roles of Tejas in transposon regulation and Tdrd5p in regulating male

identity and spermatogenesis in flies. It is widely known that regulation of germline identity is dependent on post-transcriptional mechanisms involving tudor-domain proteins such as the original Tudor protein [52], which helps define the germ plasm, an RNA body that regulates germline identity [reviewed in 53]. Further, the regulation of sex-specific gametogenesis is also dependent on RNA bodies and their requisite tudor-domain proteins, such as TDRD5 in mouse [54], [reviewed in 27]. Our studies indicate that initial germline sexual identity is similarly regulated by post-transcriptional mechanisms, including RNA bodies containing other, distinct, TUDOR-domain proteins such as Tdrd5p.

## Materials and methods

### Library Generation and sequencing

Gonads were dissected from 1-3 day old flies raised at 25°C. Ovaries were dissected from virgin females. 3 biological replicates were dissected for each genotype. Total RNA was isolated from all genotypes using RNA-bee (Tel-Test). Contaminating DNA was removed from the RNA using Turbo-DNA-free (Ambion). 200ng of RNA was used to prepare each library using the illumina TruSeq RNA Library Prep kit v2. 100bp paired-end read sequencing was done by the Johns Hopkins Genetic Resources Core Facility. The *bam* mutant male and female libraries were sequenced in one lane and the *Sxl*-RNAi, control-RNAi libraries were sequenced in separate lane, therefore having 6

libraries per lane.

## Read mapping, quality, and differential expression analysis

Quality of raw reads was assessed using the fastQC kit (Babraham Institute). RNA-Seq reads were mapped to the Drosophila genome using Ensembl BDGP6 release 85, and Bowtie 2.2.9, TopHat 2.1.1, and HTSeq 0.9.1 [55–57]. Differential gene expression analysis was done using DESeq using ensemble annotation BDGP6 [22]. Adjusted P value of 0.05 used for significance cutoff. Differential exon analysis was done using DEXSeq [19].

## Fly stocks and Fecundity Tests

The fly stocks used were obtained from Bloomington Stock Center unless otherwise indicated. *bam*<sup>1</sup> [58], *bam*<sup>Δ86</sup> (BDSC# 5427), *nos*-Gal4 [59], the control RNAi used was p{VALIUM20-mCherry}attP2 (BDSC# 35785), *uas-Sxl*-RNAi=TRiP.HMS00609 (BDSC# 34393), *uas-CG15930*-RNAi=TRiP. GL01046 (BDSC# 36882), *Snf*<sup>f148</sup>, *otu*<sup>17</sup>, *tej*<sup>48-5</sup>, attP40{*nos*-Cas9} (NIG-FLY# CAS-0001), YFP:dDCP1 (a kind gift from Ming-Der Lin, [28]). Fecundity tests were carried out by setting up crosses with one *tdrd5p* mutant male and 15 virgin females of the control stock. The control stock used is *nos*-Cas9 isogenized to FM7KrGFP fly stock to reproduce the treatment of the *tdrd5p* mutant fly lines while screening for transformants. Each male was mated with virgin females for 4 days. Females were then discarded and each male was placed with another 15 virgin females in a new bottle. This was repeated twice more for a total of four mating bottles per male.

All offspring were counted by day 18. Total offspring per male was calculated by averaging the number of offspring from each of the four mating bottles for each male.

# **Immunofluorescence**

Adult ovaries and testes were fixed, blocked and stained as previously described [60].

All images were taken with a Zeiss LSM 510 confocal microscope.

Primary antibodies and the concentrations used are as follows: chicken anti-Vasa

1:10,000 (K. Howard); rabbit anti-Vasa 1:10,000 (R. Lehmann); mouse anti-Sxl 1:8 (M18,

DSHB); mouse anti-Armadillo 1:100 (N2 7A1, DSHB); rat anti-HA 1:100 (3F10, Roche);

guinea pig  $\alpha$ -TJ (1:1,000; generated by J. Jemc using the same epitope as previously

described [61]); mouse anti-HTS 1:4 (1B1, DSHB). DSHB: Developmental Studies

Hybridoma Bank. Secondary antibodies were used at 1:500 (Alexa-fluor). Samples were

mounted in vectashield mounting solution with DAPI (vector Industries).

# **RT-PCR, quantitative RT-PCR & In-situ hybridization**

For RT-PCR and qRT-PCR, total RNA was isolated from ovaries and testes using RNA-

bee (Tel-Test). Contaminating DNA was removed from the RNA using Turbo-DNA-free

(Ambion). RNA was converted to cDNA using Superscript II (Invitrogen). qRT-PCR

was done using 2 biological replicates and in technical triplicate, using SYBR green

detection. In-situ hybridization was carried out as previously described [62]. DIG-

labelled sense and antisense probes were synthesized by in vitro transcription of PCR product generated from RP98-1M22 BAC (BACPAC Resources Center).

### **Mutagenesis and BAC-tagging**

Mutant alleles of *tdrd5p* were created using CRISPR-Cas9 mediated genome editing. Small guide RNA (sgRNA) was designed and cloned following the Perrimon lab protocol [63], using the U6b-sgRNA-short vector described therein. The sgRNA was injected by Best Gene inc into *nos*-Cas9(II-attP40) flies. The HA:*Tdrd5p* transgenic flies were generated by BAC recombineering [64,65], using the CH322-188C18 BAC obtained from the BACPAC Resources Center. A 3xHA epitope tag was added to the N-terminus of the gene (S1 Fig). This construct was also modified to delete the Sxl binding sites in the intron and the 3'UTR. The Sxl binding site in *tdrd5p* 3'UTR was deleted using QuickChange II site-directed mutagenesis kit (agilent). The intronic binding site was removed by deleting the entire intron.

### **Acknowledgements**

We thank the fly community for providing stocks and reagents, either directly as specified in the materials and methods or through their contributions to the Bloomington Stock Center, the Developmental Studies Hybridoma Bank, and BACPAC Resources. We would also like to thank David Mohr and the Johns Hopkins Sequencing

facility for technical expertise on high throughput RNA sequencing, Dr. Frederick Tan and other members of the Johns Hopkins Community for technical expertise on Bioinformatics and sequencing analysis, as well as members of the Chen, Johnston and Van Doren laboratories for helpful discussions. Imaging was performed at the Integrated Imaging Center at the John Hopkins University.

## References

1. Murray SM, Yang SY, Van Doren M. Germ cell sex determination: A collaboration between soma and germline. *Curr Opin Cell Biol.* 2010;22(6):722–9.
2. Erickson JW, Quintero JJ. Indirect effects of ploidy suggest X chromosome dose, not the X:A ratio, signals sex in *Drosophila*. *PLoS Biol.* 2007 Dec;5(12):e332.
3. Salz HK, Erickson JW. Sex determination in *Drosophila*: The view from the top. *Fly (Austin)*. 2010 Jan;4(1):60–70.
4. Camara N, Whitworth C, Van Doren M. The Creation of Sexual Dimorphism in the *Drosophila* Soma. Vol. 83, *Current Topics in Developmental Biology*. Elsevier Inc.; 2008. 65-107 p.

- 506 5. Salz HK, Cline TW, Schedl P. Functional changes associated with structural  
507 alterations induced by mobilization of a P element inserted in the Sex-lethal  
508 gene of *Drosophila*. *Genetics*. 1987;117(2):221.
- 509 6. Schupbach T. Autosomal Mutations That Interfere with Sex Determination  
510 in Somatic Cells of *Drosophila* Have No Direct Effect on the Germline. *Dev*  
511 *Biol*. 1982;189(1):117–27.
- 512 7. Schupbach T. Normal Female Germ Cell Differentiation requires the female  
513 X chromosome to Autosome Ratio and Expression of Sex-Lethal in  
514 *Drosophila melanogaster*. *Genetics*. 1985;109(3):529–48.
- 515 8. Steinmann-Zwicky M, Schmidt H, Nothiger R. Cell autonomous and  
516 inductive signals can determine the sex of the germline of *Drosophila*  
517 *melanogaster* by regulating sex-lethal. *Cell*. 1989;57:157–166.
- 518 9. Hashiyama K, Hayashi Y, Kobayashi S. *Drosophila* Sex lethal Gene Initiates  
519 Female Development in Germline Progenitors. *Science*. 2011 Jul  
520 7;333(6044):885–8.
- 521 10. Marsh JL, Wieschaus E. Is sex determination in germ line and soma  
522 controlled by separate genetic mechanisms? *Nature*. 1978;272(5650):249–51.

- 523 11. Torres M, Sánchez L. The scute (T4) gene acts as a numerator element of the  
524 X:A signal that determines the state of activity of sex-lethal in *Drosophila*.  
525 EMBO J. 1989;8(10):3079–86.
- 526 12. Bell LR, Horabin JI, Schedl P, Cline TW. Positive autoregulation of Sex-  
527 lethal by alternative splicing maintains the female determined state in  
528 *Drosophila*. Cell. 1991;65(2):229–39.
- 529 13. Duffy JB, Gergen JP. The *Drosophila* segmentation gene runt acts as a  
530 position-specific numerator element necessary for the uniform expression  
531 of the sex-determining gene Sex-lethal. Genes Dev. 1991;5(12 A):2176–87.
- 532 14. Granadino B, Santamaria P, Sánchez L. Sex determination in the germ line  
533 of *Drosophila melanogaster*: activation of the gene Sex-lethal.  
534 Development. 1993 Jul;118(3):813–6.
- 535 15. Hoshijima K, Kohyama A, Watakabe I, Inoue K, Sakamoto H, Shimura Y.  
536 Transcriptional regulation of the Sex-lethal gene by helix-loop-helix  
537 proteins. Nucleic Acids Res. 1995;23(17):3441–8.
- 538 16. Kramer SG, Jinks TM, Schedl P, Gergen JP. Direct activation of Sex-lethal  
539 transcription by the *Drosophila* runt protein. Development.

- 1999;126(1):191–200.
17. Chau J, Kulnane LS, Salz HK. Sex-lethal Facilitates the Transition From Germline Stem Cell to Committed Daughter Cell in the Drosophila Ovary. Genetics. 2009 Feb;182(1):121–32.
18. Gan Q, Chepelev I, Wei G, Tarayrah L, Cui K, Zhao K, et al. Dynamic regulation of alternative splicing and chromatin structure in Drosophila gonads revealed by RNA-seq. Cell Res. 2010 Jul;20(7):763–83.
19. Anders S, Reyes a, Huber W. Detecting diferential usage of exons from RNA-seq data. Genome Res. 2012;22(10):2008–17.
20. Yang SY, Baxter EM, Van Doren M. Phf7 controls male sex determination in the Drosophila germline. Dev Cell. 2012 May 15;22(5):1041–51.
21. Shapiro-Kulnane L, Smolko AE, Salz HK. Maintenance of Drosophila germline stem cell sexual identity in oogenesis and tumorigenesis. Dev . 2015;142(6):1073–82.
22. Anders S, Huber W. Differential expression analysis for sequence count data. Genome Biol. 2010 Oct;11(10):R106.
23. Ohlstein B, McKearin D. Ectopic expression of the Drosophila Bam protein

- eliminates oogenic germline stem cells. *Development*. 1997;124(18):3651–62.
24. Smith JM, Bowles J, Wilson M, Teasdale RD, Koopman P. Expression of the tudor-related gene *Tdrd5* during development of the male germline in mice. *Gene Expr Patterns*. 2004;4(6):701–5.
25. Yabuta Y, Ohta H, Abe T, Kurimoto K, Chuma S, Saitou M. TDRD5 is required for retrotransposon silencing, chromatoid body assembly, and spermiogenesis in mice. *J Cell Biol*. 2011;192(5):781–95.
26. Patil VS, Kai T. Repression of Retroelements in *Drosophila* Germline via piRNA Pathway by the Tudor Domain Protein Tejas. *Curr Biol*. 2010;20(8):724–30.
27. Voronina E, Seydoux G, Sassone-Corsi P, Nagamori I. RNA granules in germ cells. *Cold Spring Harb Perspect Biol*. 2011;3(12).
28. Lin M Der, Fan SJ, Hsu WS, Chou T Bin. *Drosophila* Decapping Protein 1, dDcp1, Is a Component of the oskar mRNP Complex and Directs Its Posterior Localization in the Oocyte. *Dev Cell*. 2006;10(5):601–13.
29. Ling SHM, Qamra R, Song H. Structural and functional insights into eukaryotic mRNA decapping. *Wiley Interdiscip Rev RNA*. 2011;2(2):193–

- 574           208.
- 575   30.   Sakashita E, Sakamoto H. Characterization of RNA binding specificity of  
576           the *Drosophila* Sex-lethal protein by in vitro ligand selection. Nucleic Acids  
577           Res. 1994;22(20):4082–6.
- 578   31.   Samuels ME, Bopp D, Colvin RA, Roscigno RF, Garcia-Blanco MA, Schedl  
579           P. RNA binding by Sxl proteins in vitro and in vivo. Mol Cell Biol.  
580           1994;14(7):4975–90.
- 581   32.   Lin T, Viswanathan S, Wood C, Wilson PG, Wolf N, Fuller MT. Coordinate  
582           developmental control of the meiotic cell cycle and spermatid  
583           differentiation in *Drosophila* males. Development. 1996;122:1331–41.
- 584   33.   Pek JW, Anand a., Kai T. Tudor domain proteins in development.  
585           Development. 2012;139(13):2255–66.
- 586   34.   Ding D, Liu J, Midic U, Wu Y, Dong K, Melnick A, et al. TDRD5 binds  
587           piRNA precursors and selectively enhances pachytene piRNA processing  
588           in mice. Nat Commun. 2018;9(1):127.
- 589   35.   Bozzetti MP, Massari S, Finelli P, Meggio F, Pinna L a, Boldyreff B, et al.  
590           The Ste locus, a component of the parasitic cry-Ste system of *Drosophila*

- 591 melanogaster, encodes a protein that forms crystals in primary  
592 spermatocytes and mimics properties of the beta subunit of casein kinase 2.  
593 Proc Natl Acad Sci U S A. 1995;92(13):6067–71.
- 594 36. Aravin AA, Natalia M. Naumova AVT, Vasili V. Vagin YMR and VAG.  
595 Double-stranded RNA-mediated silencing of genomic tandem repeats and  
596 transposable elements in the D. melanogaster germline. Curr Biol.  
597 2001;11(13):1017–27.
- 598 37. Storto PD, King RC. Fertile heteroallelic combinations of mutant alleles of  
599 the otu Locus of Drosophila Melanogaster. Roux's Arch Dev Biol.  
600 1987;196(4):210–21.
- 601 38. Gans M, Audit C, Masson M. Isolation and characterization of sex-linked  
602 female-sterile mutants in Drosophila melanogaster. Genetics.  
603 1975;81(4):683–704.
- 604 39. Gollin SM, King RC. Studies of fs(1)1621, a Mutation Producing Ovarian  
605 Tumors in Drosophila melanogaster. Dev Genet. 1981;2:203–18.
- 606 40. Oliver B, Perrimon N, Mahowald AP. Genetic Evidence That the sans fille  
607 Locus Is Involved in Drosophila Sex Determination. Genetics. 1988;120:159–

- 608 71.
- 609 41. King RC, Mohler D, Riley SF, Storto PD, Nicolazzo PS. Complementation  
610 between alleles at the ovarian tumor locus of *Drosophila melanogaster*. *Dev*  
611 *Genet*. 1986;7(1):1–20.
- 612 42. Chau J, Kulnane LS, Salz HK. Sex-lethal enables germline stem cell  
613 differentiation by down-regulating Nanos protein levels during *Drosophila*  
614 oogenesis. *Proc Natl Acad Sci U S A*. 2012 Jun 12;109(24):9465–70.
- 615 43. Nagengast AA, Stitzinger SM, Tseng C-H, Mount SM, Salz HK. Sex-lethal  
616 splicing autoregulation in vivo: interactions between Sex-lethal, the U1  
617 snRNP and U2AF underlie male exon skipping. *Development*.  
618 2003;130:463–71.
- 619 44. Hager JH, Cline TW. Induction of female Sex-lethal RNA splicing in male  
620 germ cells: implications for *Drosophila* germline sex determination.  
621 *Development*. 1997 Dec;124(24):5033–48.
- 622 45. Bashaw GJ, Baker BS. The *msl-2* dosage compensation gene of *Drosophila*  
623 encodes a putative DNA-binding protein whose expression is sex  
624 specifically regulated by Sex-lethal. *Development*. 1995 Oct;121(10):3245–

- 625 58.
- 626 46. Gupta V, Parisi M, Sturgill D, Nuttall R, Doctolero M, Dudko O, et al.  
627 Global analysis of X-chromosome dosage compensation. J Biol. 2006;5(1):3.
- 628 47. Meiklejohn CD, Landeen EL, Cook JM, Kingan SB, Presgraves DC. Sex  
629 chromosome-specific regulation in the drosophila male germline but little  
630 evidence for chromosomal dosage compensation or meiotic inactivation.  
631 PLoS Biol. 2011;9(8).
- 632 48. Bachiller D, Sánchez L. Mutations affecting dosage compensation in  
633 *Drosophila melanogaster*: Effects in the germline. Dev Biol. 1986;118(2):379–  
634 84.
- 635 49. Rastelli L, Kuroda MI. An analysis of maleless and histone H4 acetylation  
636 in *Drosophila melanogaster* spermatogenesis. Mech Dev. 1998;71(1–2):107–  
637 17.
- 638 50. Lin M Der, Jiao X, Grima D, Newbury SF, Kiledjian M, Chou T Bin.  
639 *Drosophila* processing bodies in oogenesis. Dev Biol. 2008;322(2):276–88.
- 640 51. Patil VS, Anand A, Chakrabarti A, Kai T. The Tudor domain protein Tapas,  
641 a homolog of the vertebrate Tdrd7, functions in the piRNA pathway to

- 642 regulate retrotransposons in germline of *Drosophila melanogaster*. BMC  
643 Biol. 2014;12(1):61.
- 644 52. Boswell RE, Mahowald AP. tudor, a gene required for assembly of the  
645 germ plasm in *Drosophila melanogaster*. Cell. 1985;43(1):97–104.
- 646 53. Mahowald AP. Assembly of the *Drosophila* Germ Plasm. Int Rev Cytol.  
647 2001;203:187–213.
- 648 54. Yabuta Y, Ohta H, Abe T, Kurimoto K, Chuma S, Saitou M. TDRD5 is  
649 required for retrotransposon silencing, chromatoid body assembly, and  
650 spermiogenesis in mice. J Cell Biol. 2011;192(5):781–95.
- 651 55. Kim D, Pertea G, Trapnell C, Pimentel H, Kelley R, Salzberg SL. TopHat2:  
652 accurate alignment of transcriptomes in the presence of insertions,  
653 deletions and gene fusions. Genome Biol. 2013;14(4):R36.
- 654 56. Trapnell C, Roberts A, Goff L, Pertea G, Kim D, Kelley DR, et al.  
655 Differential gene and transcript expression analysis of RNA-seq  
656 experiments with TopHat and Cufflinks. Nat Protoc. 2012;7(3):562–78.
- 657 57. Anders S, Pyl PT, Huber W. HTSeq-A Python framework to work with  
658 high-throughput sequencing data. Bioinformatics. 2015;31(2):166–9.

- 659 58. McKearin DM, Spradling a C. bag-of-marbles: a Drosophila gene required  
660 to initiate both male and female gametogenesis. Genes Dev. 1990  
661 Dec;4(12b):2242–51.
- 662 59. Van Doren M, Williamson a L, Lehmann R. Regulation of zygotic gene  
663 expression in Drosophila primordial germ cells. Curr Biol. 1998 Feb  
664 12;8(4):243–6.
- 665 60. Gonczy P, Matunis E, DiNardo S, Gönczy P, Matunis E, DiNardo S. bag-of-  
666 marbles and benign gonial cell neoplasm act in the germline to restrict  
667 proliferation during Drosophila spermatogenesis. Development.  
668 1997;124:4361–71.
- 669 61. Li M a, Alls JD, Avancini RM, Koo K, Godt D. The large Maf factor Traffic  
670 Jam controls gonad morphogenesis in Drosophila. Nat Cell Biol.  
671 2003;5(11):994–1000.
- 672 62. Morris C a, Benson E, White-Cooper H. Determination of gene expression  
673 patterns using in situ hybridization to Drosophila testes. Nat Protoc.  
674 2009;4(12):1807–19.
- 675 63. Ren X, Sun J, Housden BE, Hu Y, Roesel C, Lin S, et al. Optimized gene

editing technology for *Drosophila melanogaster* using germ line-specific

Cas9. *Proc Natl Acad Sci U S A*. 2013;110(47):19012–7.

64. Venken KJT, Kasrowicz J, Kuenen S, Yan J, Hassan BB, Verstreken P.

Recombineering-mediated tagging of *Drosophila* genomic constructs for in

vivo localization and acute protein inactivation. *Nucleic Acids Res*.

2008;36(18):1–9.

65. Venken KJT, Carlson JW, Schulze KL, Pan H, He Y, Spokony R, et al.

Versatile P[acman] BAC libraries for transgenesis studies in *Drosophila*

*melanogaster*. *Nat Methods*. 2009;6(6):431–4.

## Figure legends

### Fig 1. Global effects of *Sxl* loss from the germline.

A-C) Immunofluorescence of adult ovaries with antibodies as indicated in the figure. A)

wild type ovaries, B-C) ovaries used for the RNASeq experiment: *bam* mutant control

RNAi ovaries (B-B'), and *bam* mutant ovaries with *Sxl* knocked down in the germline by

RNAi (C-C'). Knockdown of *Sxl* causes a germline tumor phenotype. Note the absence

of *Sxl* from the germline of *Sxl*-RNAi ovaries and presence in all germ cells of the

control RNAi. Dashed lines outline ovarioles. Arrows mark the tips of ovarioles.

Arrowheads mark differentiating egg chambers. Vasa stains germ cells. D) Principle component analysis comparing each replicate of all four genotypes used in the RNAseq experiment E) Pie chart representing the 94 genes with significant changes in expression levels in *Sxl* RNAi compared to control RNAi and the corresponding changes in *bam* males (*bamM*) vs. *bam* females.

**Fig 2. *tdrd5p* has male-biased expression.**

A) Graph showing the RNA-seq expression profiles of genes with important germline functions. B) RT-PCR showing validation of RNA-seq data for *tdrd5p* upregulation in *Sxl* RNAi. C-D) In-situ hybridization showing expression of *tdrd5p* mRNA in wild type testes (C) and ovaries (D). Sense probe produced no signal (not shown). E-F) Confocal images showing expression of the HA tagged Tdrd5p protein in wild type testes (E) and ovaries (F). Asterisk marks the hub. Arrows show HA:Tdrd5p cytoplasmic punctae. G) Higher magnification image showing size and distribution of HA:Tdrd5p punctae in adult testes. H-H') Confocal images showing colocalization of HA:Tdrd5p (arrows) with YFP:DCP1 (arrows) in adult testes. Antibodies used are as shown in the figure: HA stains Tdrd5p, YFP stains DCP1, Vasa stains germ cells, TJ stains somatic cells.

**Fig 3. Tdrd5p expression is repressed by *Sxl* function in the female germline.**

Expression of the HA-tagged Tdrd5p protein in A) wild type ovaries, in B) ovaries with *Sxl* knocked down in the germline, and in C) ovaries expressing the HA:*tdrd5p*<sup>ddel</sup>

transgene, a construct which lacks the two Sxl binding sites. D) Higher magnification image of Sxl-RNAi ovaries showing increase in HA:Tdrd5p punctae (arrows). Antibodies used are as described in figure: HA stains HA:Tdrd5p, Vasa stains germ cells, TJ stains somatic cells. E) Immunoblot comparing HA:Tdrd5p expression in HA:Tdrd5p adult ovaries and HA:Tdrd5p<sup>ddel</sup> adult ovaries. Antibody against Sxl is used as a loading control.

**Fig 4. *tdrd5p* is needed for proper male fertility and germline development.**

A-C'') Confocal images showing germ cell loss phenotype in testes of aged *tdrd5p* mutant flies raised at 25°C (n = 29 testes) and 29°C (n = 39 testes). Asterisk marks the hub. D-E) Confocal images showing hub displacement in *tdrd5p* adult mutant testes. Arrows mark the hub. Vasa stains germ cells, ZFH1 and TJ stain somatic cells, Arm stains membranes, DAPI stains DNA. Antibodies used are as described in the figure. F) Graph showing the total progeny produced per male, comparing *tdrd5p* mutant males to controls. *tdrd5p* mutant males have a 50% reduction in fecundity. Data shown represents the average of two independent experiments with 5 males per test. Significance determined by two-tailed unpaired t test (\*\*P<0.01). See methods for description of control genotype.

**Fig 5. *tdrd5p* promotes male identity in the germline.**

Confocal images of A) wild type XY adult testes, B) XX *tra* mutant adult testes, and C) XX *tra* mutant adult testes rescued by *tdrd5p* expression in the germline, driven by *nos-gal4-VP16* driver (n=101 testes). D-F') Ectopic expression of *tdrd5p* enhances the *snf* mutant phenotype. Confocal images of D) *snf*/+ adult ovaries, E) *snf*/+ adult ovaries with ectopic expression of *tdrd5p*, driven in the germline by *nos-gal4-VP16*, and F) *snf*/*snf* mutant adult ovaries, showing the germline tumor phenotype. Vasa stains germ cells, TJ stains somatic cells, Arm and HTS stain membranes, Dapi stains DNA, antibodies used are as indicated in the figure. G) Quantification of the degree of enhancement of the *snf* and *otu* mutant phenotypes with ectopic *tdrd5p* expression. The number of ovaries scored per genotype is shown in each bar.

## Supporting Information

**S1 Table. RNAseq analysis\_changes in exon usage.**

**S2 Table. RNAseq analysis\_gene expression changes.**

**S1 Fig. *tdrd5p* gene model.**

A) Schematic of the Bacterial Artificial Chromosome used to insert a hemagglutinin (HA) tag in *tdrd5p* by BAC recombineering (not drawn to scale). The *tdrd5p* gene is shown in reference to its closest neighboring genes: *sas10* at its 5' end and CG4198 at its 3' end, which are both on the opposite strand. B) Gene model of *tdrd5p*. The HA tag was

749 inserted at the N-terminus of *tdrd5p* immediately after the start codon. Putative Sxl  
750 binding sites are located in the 3<sup>rd</sup> intron and the 3'UTR. Mutant alleles described were  
751 generated by CRISPR-Cas9-mediated gene editing in the 1<sup>st</sup> exon.

752 **S2 Fig. Stellate transposon is not upregulated in *tdrd5p* mutants.**

753 Confocal images showing expression of stellate crystals (arrows) in A) *tej* mutant testes  
754 but not in B) *tdrd5p* mutant testes. Antibodies used are as indicated in the figure.

755

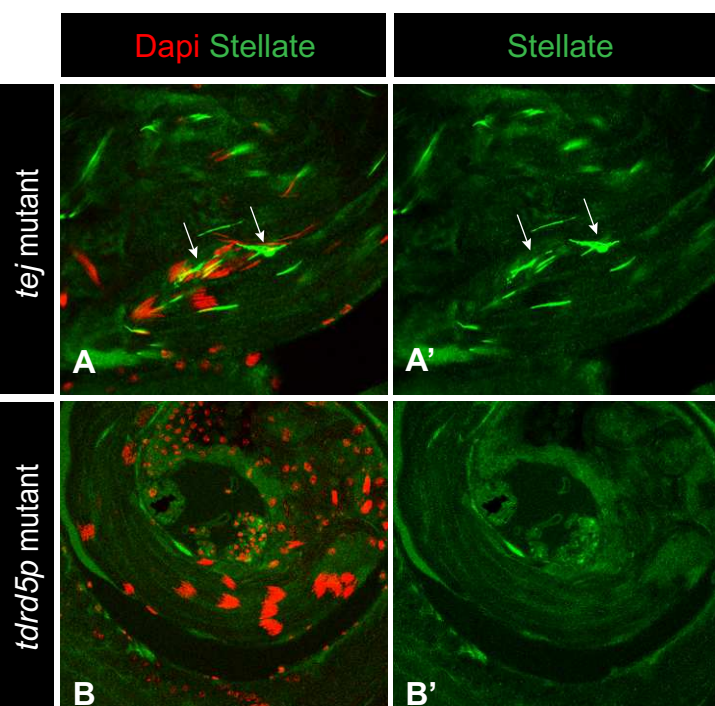

**A**

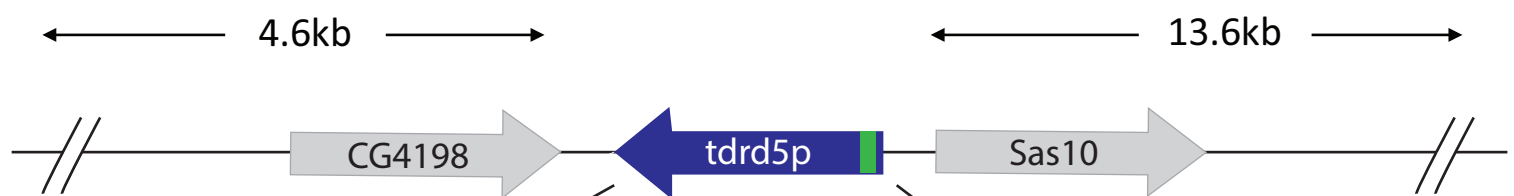

**B**

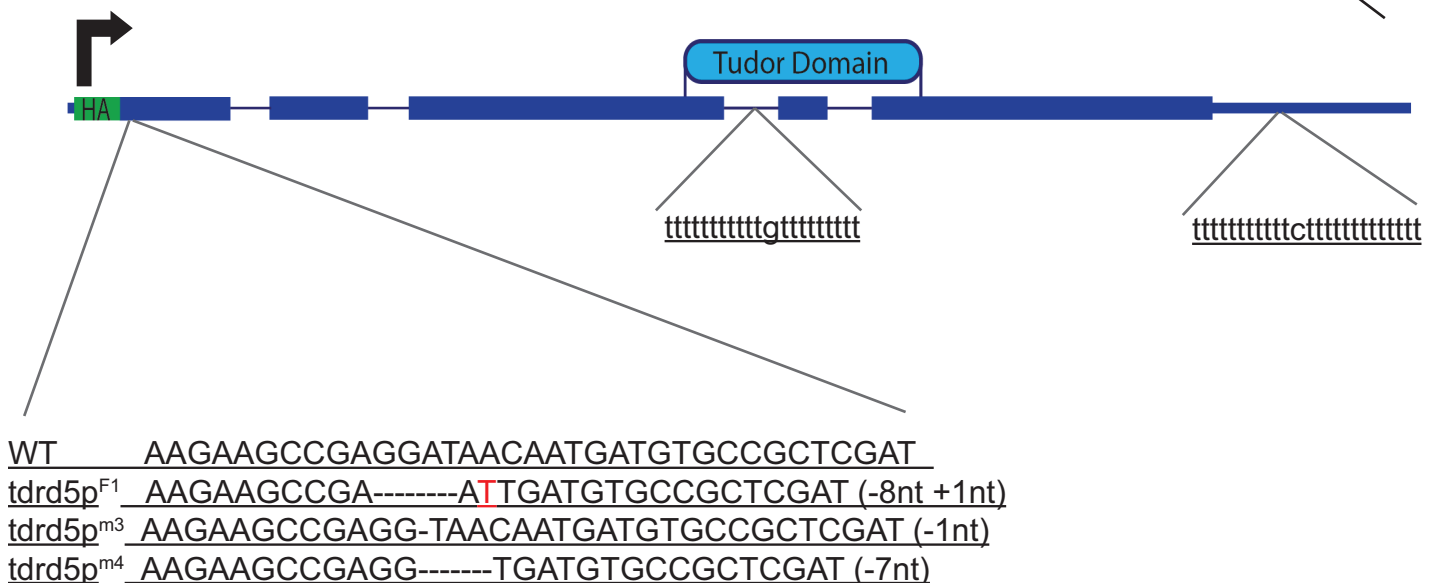

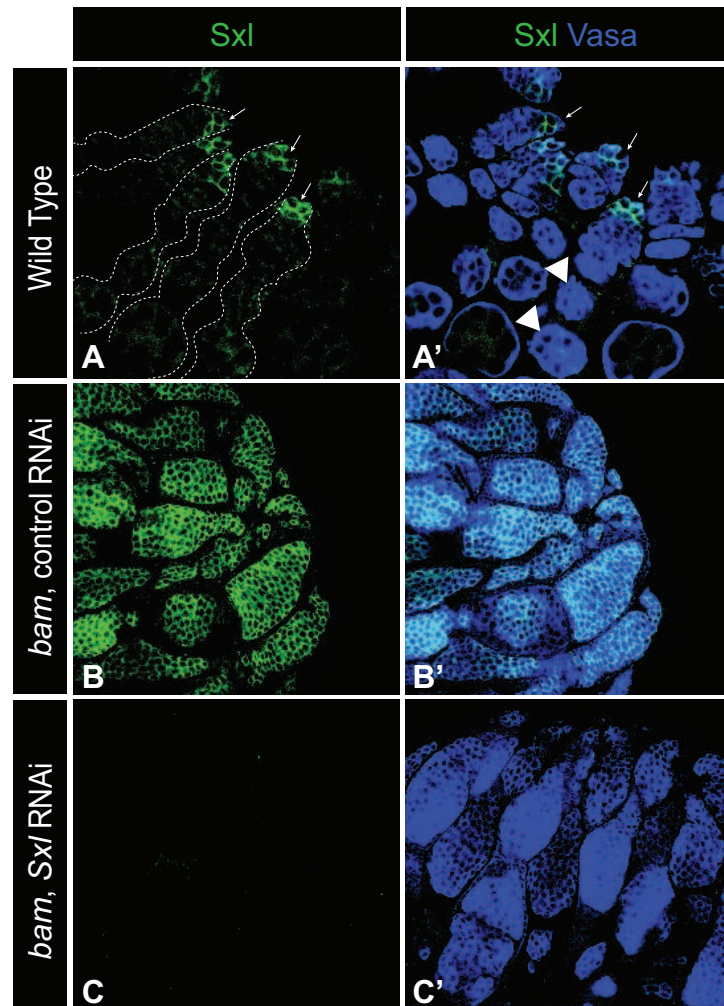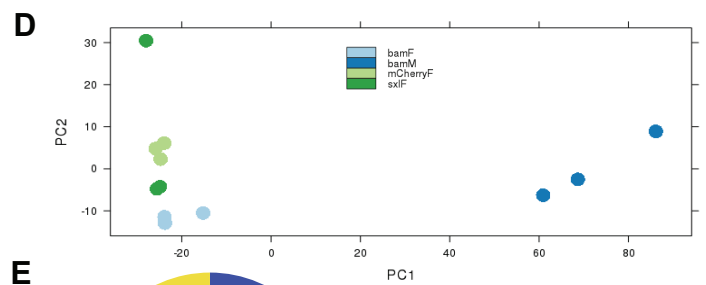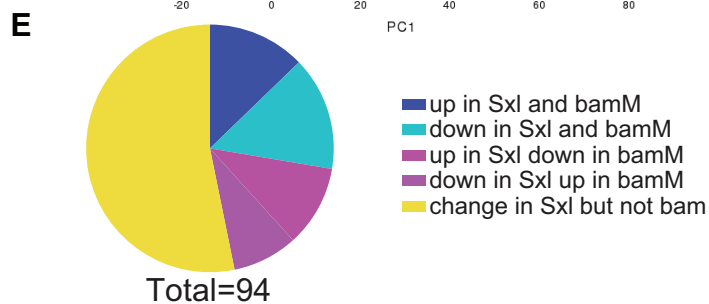

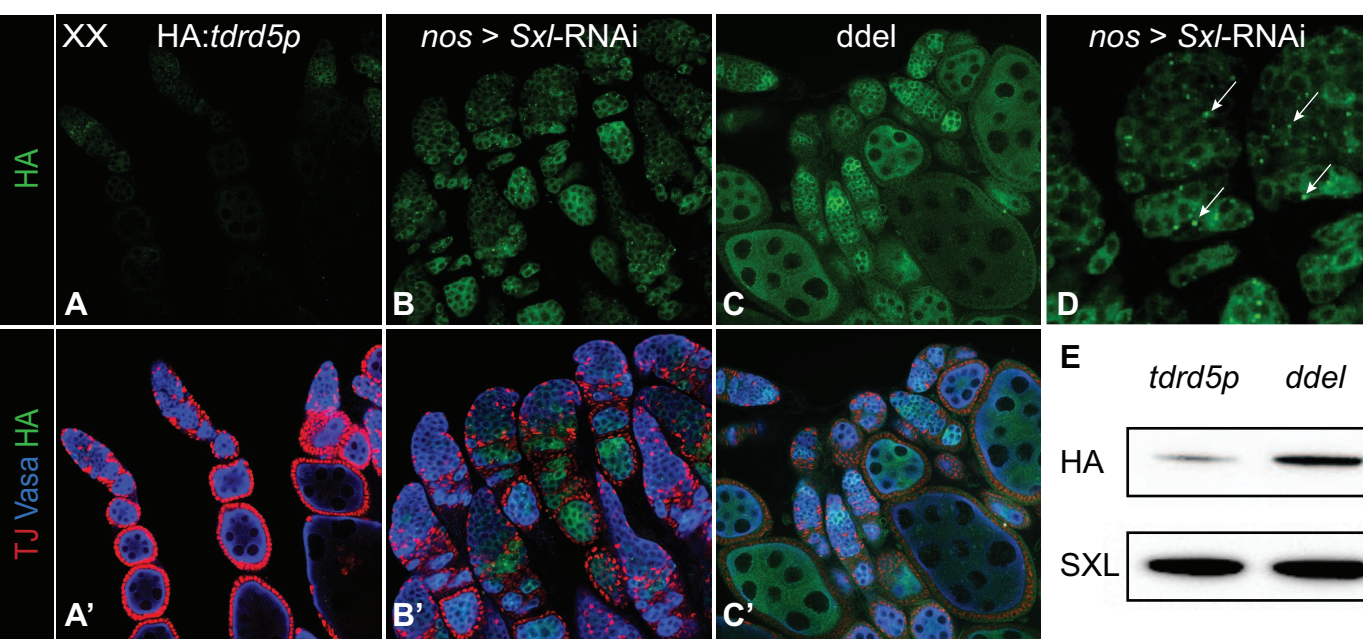

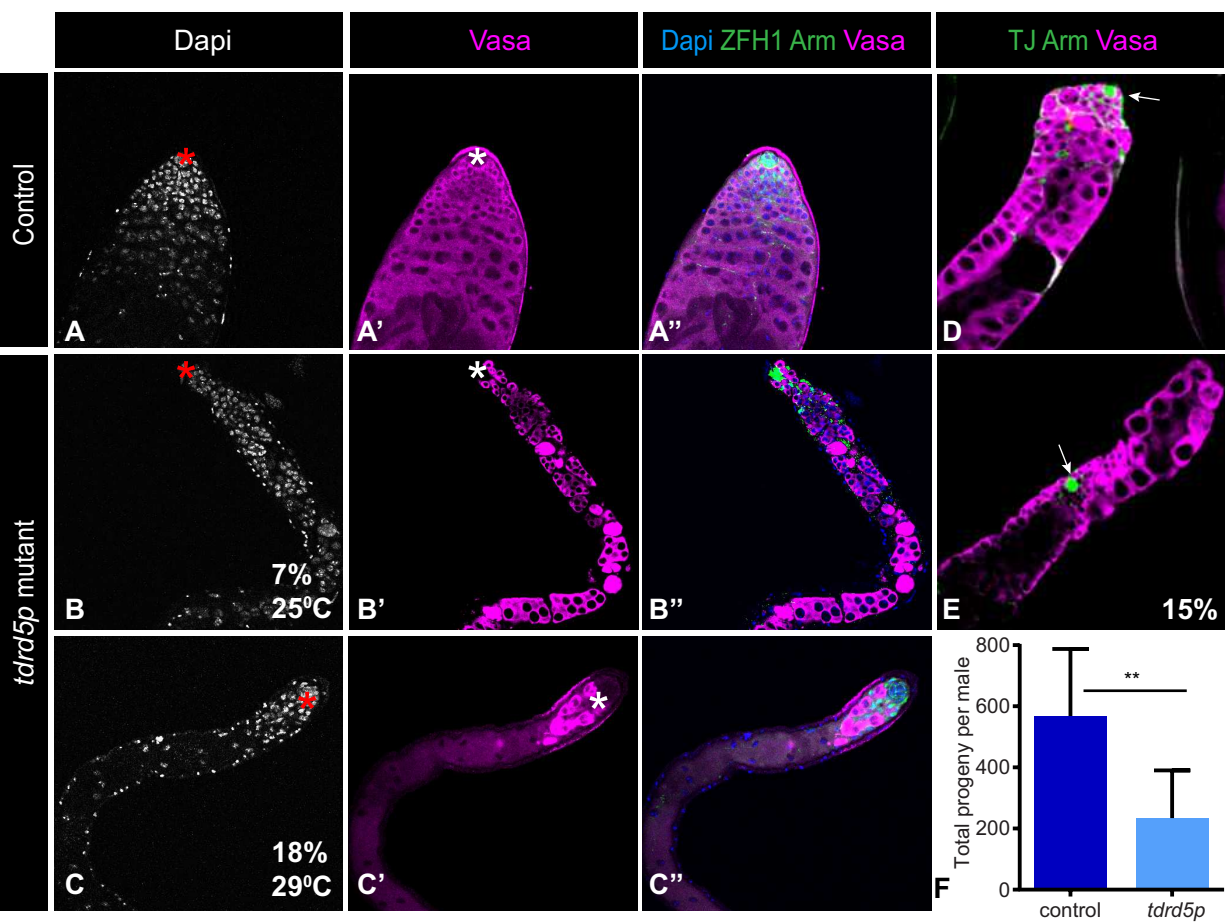

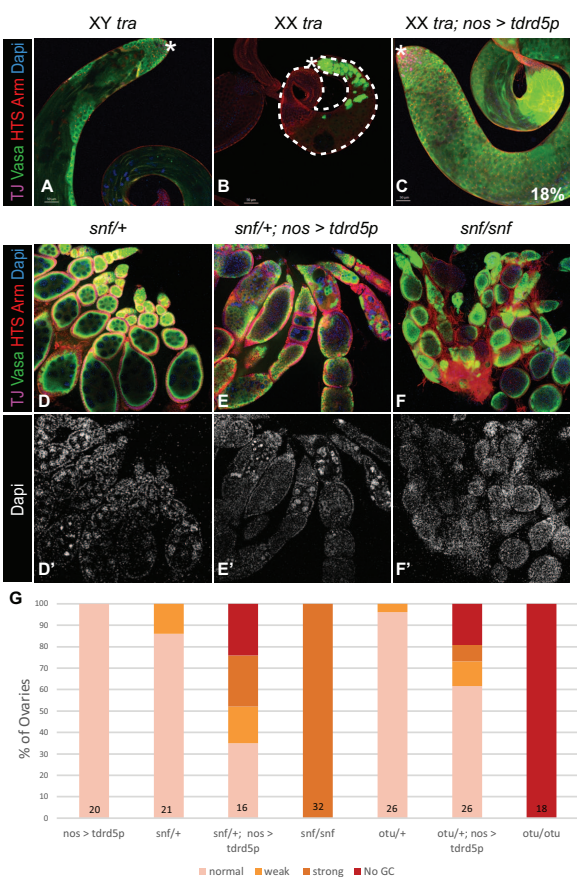

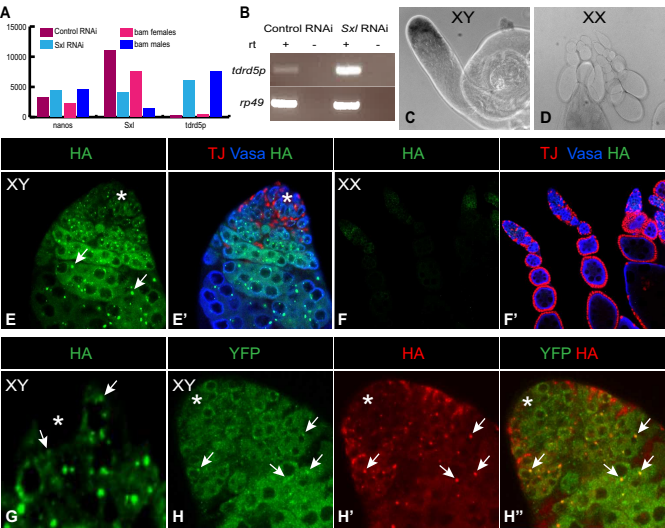

Source: https://www.biorxiv.org/content/10.1101/388850v1.full.pdf
